Phosphorylation and dephosphorylation of Ser852 and Ser889 control clustering, localization, and function of PAR-3

Running title: Clustering regulation of PAR-3

Kazunari Yamashita<sup>1,2</sup>, Keiko Mizuno<sup>1</sup>, Kana Furukawa<sup>1,3</sup>, Hiroko Hirose<sup>1</sup>, Natsuki Sakurai<sup>1</sup>, Maki Masuda-Hirata<sup>1</sup>, Yoshiko Amano<sup>1</sup>, Tomonori Hirose<sup>1</sup>, Atsushi Suzuki<sup>1,4</sup>, and Shigeo Ohno<sup>1,\*</sup>

<sup>1</sup>Department of Molecular Biology, Yokohama City University School of Medicine, Kanazawa-ku, Yokohama 236-0004, Japan

<sup>2</sup>Department of Molecular and Chemical Life Sciences, Graduate School of Life Sciences, Tohoku University, Aoba-ku, Sendai, Miyagi 980-8578, Japan

<sup>3</sup>Laboratory for Lung Development and Regeneration, RIKEN Center for Biosystems Dynamics Research, Kobe 650-0047, Japan

<sup>4</sup>Molecular Cellular Biology Laboratory, Yokohama City University Graduate School of Medical Life Science, Tsurumi-ku, Yokohama 230-0045, Japan

\*Author for correspondence (ohnos@med.yokohama-cu.ac.jp)

## Abstract

Cell polarity is essential for various asymmetric cellular events, where the partitioning defective (PAR) protein, PAR3, plays a unique role as a cellular landmark to establish polarity. In epithelial cells, PAR3 localizes at the subapical border such as the tight junction in vertebrates and functions as an apical determinant. Although there is much information about the regulators of PAR3 localization, the mechanism involved in PAR3 concentration and localization to the specific membrane domain remains an important question to be clarified. In this study, we demonstrate that ASPP2, a stimulator of PAR3 localization, can link PAR3 and protein phosphatase 1 (PP1). The ASPP2-PP1 complex

dephosphorylates a novel phosphorylation site, Ser852, of PAR3. Furthermore, Ser852- or Ser889-unphosphorylatable PAR3 mutants form protein clusters and ectopically localize to the lateral membrane. Concomitance of clustering and ectopic localization suggests that PAR3 localization is a consequence of local clustering. We also demonstrate that unphosphorylatable forms of PAR3 are static in molecular turnover and fail to coordinate rapid reconstruction of the tight junction, supporting that both phosphorylated and dephosphorylated states are essential for the functional integrity of PAR3.

#### Key words

Cell polarity, polarity, PAR3, ASPP2, aPKC, epithelial

#### Summary statement

We show that phosphorylation and dephosphorylation regulate clustering of PAR-3, a cell polarity-regulating factor, and how the clustering regulation affects localization of PAR-3 and cell-cell junction formation.

#### Introduction

Cell polarity, one of the basic properties of cells, results in the asymmetric distribution of cell components and is governed by sets of evolutionarily conserved polarity-regulating factors such as the PAR–aPKC system. PAR proteins were first identified in the asymmetric cell division of *C. elegans* zygotes (Kemphues et al., 1988). Mutants of these factors failed in the asymmetric cell division, and some of these proteins were found to asymmetrically localize to the anterior side or the posterior side (Etemad-Moghadam et al., 1995; Tabuse et al., 1998). The PAR–aPKC system functions in various asymmetric biological processes of animals such as asymmetric cell division of

stem cells and establishment and maintenance of the asymmetric apical and basolateral membrane domain in epithelial cells (Izumi et al., 1998; Knoblich, 2001; Ohno, 2001; Suzuki and Ohno, 2006; Tepass et al., 2001). Although the downstream molecules of these factors are still under investigation, the basic concept for the mechanism of polarity establishment by the PAR–aPKC system has already been proposed, that is, mutual antagonism and positive feedback enhancement. The apical determinant aPKC phosphorylates the basolateral regulators PAR1 and Lgl and excludes them from the apical domain (Betschinger et al., 2003; Suzuki et al., 2004; Yamanaka et al., 2003). Inversely, PAR1 phosphorylates the apical determinant PAR3 and excludes it from the lateral membrane domain (Benton and St Johnston, 2003). In addition, Lgl inhibits the activity of aPKC (Yamanaka et al., 2003). The essentiality of the positive feedback loop that enables self-recruitment of apical determinants was demonstrated in aPKC and the Crumbs complex, another apical determinant protein complex, using both computer simulations and in vivo experiments (Fletcher et al., 2012).

In epithelial cells, the PAR3–aPKC–PAR6–Cdc42 complex (the PAR complex) functions as an apical determinant. PAR3 localizes at the subapical membrane domain, the tight junction in mammalian epithelial cells, and the adherens junction in *Drosophila*, whereas aPKC and PAR6 localize to both the tight junction and the apical membrane domain (Hirose et al., 2002; Morais-de-Sa et al., 2010). PAR3 localizes to primordial adherens junctions prior to other PAR complex components (Suzuki et al., 2002) and plays a unique role in the PAR complex in determining the initial formation of the PAR complex at the cell–cell contact region that becomes the subapical region as a molecular landmark after polarity establishment. All of these observations, combined with other observations on the formation of the tight junction in epithelial cells, implicate the importance of PAR3 localization at a specific membrane domain during polarity establishment (Chen and Macara, 2005; Horikoshi et al., 2009).

PAR3 does not have the transmembrane domain, but it can interact with transmembrane proteins such as JAM (Ebnet et al., 2001) and E-cadherin (Harris and Peifer, 2005) and can also interact with lipids such as phosphatidic acid and phosphoinositides (Horikoshi et al., 2011; Krahn et al., 2010; Yu and Harris, 2012). These interactions can anchor PAR3 to the plasma membrane. The N-terminal oligomerization domain is essential for PAR3 localization to the tight junction region (Mizuno et al., 2003). The PAR3-binding protein ASPP2 is also required for the localization of PAR3 (Cong et al., 2010). Another study demonstrated that phosphorylations of Ser151 (corresponding to Ser144 of mammals) and Ser1085 (corresponding to Ser889 of mammals) in Bazooka/PAR3 by PAR1 result in the exclusion of Bazooka/PAR3 from the lateral membrane in *Drosophila* epithelial cells (Benton and St Johnston, 2003; Hurd et al., 2003). However, how these mechanisms account for the regulation of PAR3 localization and how these mechanisms relate to each other remain unclear.

In this study, we demonstrate that the ASPP2-PP1 complex dephosphorylates the novel phosphorylation site Ser852 of PAR3 and that dephosphorylation of Ser852 or Ser889 promotes cluster formation and accumulation of PAR3. This phosphorylation-dephosphorylation cycle could ensure the accumulation and turnover of PAR3, which is important for the rapid recruitment of PAR3 to the specific membrane domains where PAR3 acts as a landmark for other polarity regulators.

89

## 90 **Results**

91

### 92 **The interaction between PP1 and PAR3 is mediated by ASPP2 and is essential for proper** 93 **PAR3 localization**

94 As described above, ASPP2 is required for the localization of PAR3 to the tight junction (Cong et al., 2010). In addition to PAR3, ASPP2 can interact with a variety of proteins, including p53. This protein had also been identified as a subunit of protein phosphatase 1 $\alpha$  (PP1 $\alpha$ ), suggesting that PAR3

can form the protein complex with ASPP2 and PP1 (Helps et al., 1995). Consistently, another study demonstrated that PAR3 interacts with PP1 $\alpha$  (Traweger et al., 2008). We hypothesized that ASPP2 would bridge the interaction between PAR3 and PP1 $\alpha$  and confirmed that PP1 $\alpha$  was coimmunoprecipitated with PAR3 (Fig. 1A). By knocking down ASPP2, coimmunoprecipitated PP1 $\alpha$  was significantly decreased (Fig. 1A). To investigate the significance of the ASPP2–PP1 $\alpha$  association on the regulation of PAR3, we adopted ASPP2 mutants lacking the interaction with PP1 $\alpha$ . ASPP2 harbors the evolutionarily conserved RVKF stretch, which matches the PP1-binding consensus sequence, in the PP1-binding domain (Fig. 1B; Fig. S1A) (Egloff et al., 1997). We generated several mutants, including the previously reported ASPP2-REVD mutant (R921E and V922D) (Liu et al., 2011). This mutant was severely defected in the interaction with PP1 $\alpha$  (Fig. 1C). YAP and LATS, Hippo pathway factors, have been reported to interact with ASPP2. YAP binds to the proline-rich domain and the SH3 domain, and LATS binds to the PP1 $\alpha$ -binding domain of ASPP2 (Rotem et al., 2007; Vigneron et al., 2010). Although the ASPP2 mutant lacking the C-terminus (ASPP2-del3) was impaired to interact with YAP and LATS2, the REVD mutation did not affect the interaction with YAP and LATS2 (Fig. 1C,D). This supports that the REVD mutation does not disrupt functions of ASPP2 other than binding to PP1 $\alpha$ . We next expressed intact ASPP2 and ASPP2-REVD mutant to previously established ASPP2-knockdown MDCK cells (Cong et al., 2010). We observed that re-expression of ASPP2 rescued the cell–cell localization of PAR3, whereas the expression of the ASPP2-REVD mutant had no significant effect on PAR3 localization (Fig. 1E,F; Fig. S1B). These results indicate that ASPP2 can act as an adaptor linking PP1 to PAR3 and suggest that this function is involved in the proper cell–cell localization of PAR3.

# **Ser852 of PAR3 is a novel phosphorylation site that acts as a 14-3-3-binding site**

The significance of the ASPP2–protein phosphatase interaction implies that dephosphorylation of

PAR3 would promote the junctional localization of PAR3. In fact, several studies had already demonstrated that Ser144 and Ser889 are phosphorylated and serve as binding sites for 14-3-3 and that these phosphorylations regulate PAR3 localization and function (Fig. 2A) (Benton and St Johnston, 2003; Hurd et al., 2003). Initially, we investigated whether the phosphorylations of Ser144 or Ser889 were affected by the depletion of ASPP2. However, there were no significant effects on these phosphorylation levels (Fig. 3C,D). Therefore, we explored unidentified 14-3-3-binding phosphorylation sites in PAR3. First, we performed far-western blotting using several His-T7-Xpress (HTX) tag-fused fragments of PAR3 and bacterially produced GST-14-3-3 $\zeta$  as a probe. Among them, 1-269 aa fragment exhibited weak affinity to 14-3-3 $\zeta$ , whereas 710-936 aa fragment showed the strongest affinity (Fig. 2B). This result supports that 14-3-3 binds to phosphorylated Ser144 and Ser889 and that 14-3-3 also recognizes other residues in the 710-936 aa fragment in addition to Ser889. Next, the transcriptional isoforms of PAR3 were subjected to far-western blotting. The mouse short isoform PAR3 that lacks 827-856 aa (sPAR3\_ $\Delta$ PB, RefSeq XP\_006531595) was cloned in an earlier study (Hirose et al., 2002), and this isoform exhibited weaker affinity to 14-3-3 $\zeta$  than to sPAR3, suggesting that important amino acid stretches are located in 827-856 aa (Fig. 2C). On this basis, we produced several Ser point mutants and found that Ser852 would be the novel 14-3-3-binding site of PAR3 (Fig. 2D). Ser852 may be conserved among vertebrates and chordates, whereas S144 and S889 are more widely conserved (Fig. 2E; Fig. S2A,B). We raised antibodies recognizing the respective phosphorylations of Ser852 and Ser889 and confirmed the phosphorylation of Ser852 (Fig. S2C). To evaluate the phosphorylation level of Ser144, we adopted the commercially available monoclonal antibody against the 14-3-3-binding consensus motif (K/RXXpSXP) because the sequence around Ser144 is the only stretch matching this consensus in PAR3 of mouse, rat, and dog. In fact, we confirmed that this monoclonal antibody relatively specifically recognized the phosphorylation of Ser144 (Fig. S2D,E). As it has been reported that

Ser151 and Ser1085 of *Drosophila* Bazooka/PAR3 are phosphorylated by polarity-regulating kinase PAR-1, we checked whether PAR-1b/MARK2, one of the four mammalian orthologs of PAR-1, phosphorylates Ser852 of PAR3. The amino acid sequence around Ser852 rather matches the consensus sequence of the PAR-1 substrate (Fig. S2F) (Nesic et al., 2010). In an in vitro kinase assay, it was observed that PAR-1b phosphorylated the PAR3 842-876 aa fragment to the extent comparable to that of tau, an established substrate of PAR-1b (Drewes et al., 1997), but it did not phosphorylate the S852A mutant fragment (Fig. 2F). Consistently, overexpression of PAR-1b significantly upregulated the phosphorylation of both Ser144 and Ser852 (Fig. 2G; Fig. S2G). We next evaluated whether endogenous PAR-1 family kinases contribute to the phosphorylation of Ser852. Because siRNA appears to be unsuitable for inhibiting all of the four PAR-1 homologs, we adopted the GFP-tagged MKI-peptide derived from *Helicobacter pylori* CagA, which would inhibit PAR-1 family kinases (Nesic et al., 2010; Saadat et al., 2007). We observed that MKI successfully inhibited the PAR-1b overexpression-mediated phosphorylation of Ser144 and Ser852. However, it did not significantly inhibit the endogenous phosphorylation of Ser852 and other sites (Fig. 2H). Altogether, PAR-1b can phosphorylate both Ser144 and Ser852 of PAR3. However, not only PAR-1 family kinases but also the other kinases may phosphorylate Ser144 and Ser852.

161

## 162 **The ASPP2–PP1 $\alpha$ complex dephosphorylates Ser852 of PAR3**

We evaluated whether Ser852 of PAR3 is a dephosphorylation target of the ASPP2–PP1 $\alpha$  complex. We observed that depletion of ASPP2 upregulated the phosphorylation level of Ser852 (Fig. 3A,B). We also evaluated the phosphorylation levels of other sites, including Ser827, the target of aPKC (Nagai-Tamai et al., 2002). However, we could not detect any significant change in the phosphorylation levels other than that of Ser852. Owing to the poor specificity of the antibodies, PAR3 immunopurification was required for evaluation (Fig. 3C, lane3 and 4; Fig. 3D). These results

169 suggest that the ASPP2–PP1 $\alpha$  complex is involved in the dephosphorylation of Ser852. Next, we  
 170 assessed the involvement of PP1. The phosphorylation level of Ser852 significantly decreased in a  
 171 PP1 $\alpha$  dose-dependent manner in the in vitro dephosphorylation assay (Fig. 3E,F). PP1 $\alpha$  also  
 172 efficiently dephosphorylated other sites, especially Ser144 and Ser827, suggesting that PP1 $\alpha$  can  
 173 dephosphorylate several sites (Fig. S3A,B). Taken together with the ASPP2-knockdown experiment,  
 174 PP1 $\alpha$  may not be the only factor for the dephosphorylation of Ser144 and Ser827. The significance  
 175 of PP1 on Ser852 was also confirmed using the PP1-specific inhibitor tautomycin (Mitsuhashi et  
 176 al., 2001). Treatment with tautomycin upregulated the phosphorylation of Ser852 of PAR3 and  
 177 Thr18/Ser19 of the myosin light chain without affecting Thr412/Thr410 of aPKC $\lambda/\zeta$  and total  
 178 phospho-Thr, whereas treatment with calyculin A, a nonspecific phosphatase inhibitor, upregulated  
 179 all of the phosphorylations that we had tested, supporting the specificity of tautomycin (Fig. 3G,H;  
 180 Fig. S3C). All of these data support the notion that ASPP2-associated PP1 dephosphorylates Ser852  
 181 of PAR3.

182

### 183 **Dephosphorylated PAR3 can localize to the cell–cell junction irrespective of ASPP2 expression**

184 Immunofluorescence experiments showed that both sPAR3-WT and S852A mutant localized to the  
 185 tight junction region (Fig. 4A,B). Even in ASPP2-knockdown cells, sPAR3-S852A strongly localized  
 186 to the tight junction region, although the localization of sPAR3-WT was disrupted (Fig. 4A,B).  
 187 These results indicate the critical role of the ASPP2–PP1 $\alpha$  complex in PAR3 localization and  
 188 dephosphorylation of Ser852. The phosphorylation of Ser852 was strikingly inhibited by the  
 189 nonspecific kinase inhibitor staurosporine (Fig. 4C), and staurosporine treatment also promoted the  
 190 cell–cell junction localization of exogenously expressed sPAR3 (Fig. 4D). This result supports the  
 191 critical importance of the phosphorylation of Ser852 and that dephosphorylation of Ser852 promotes  
 192 the localization of PAR3 to cell–cell junctions.



193

194 **PAR3-S852A and S889A mutants tend to organize ectopic protein clusters and fail to rescue**  
 195 **the early step of tight junction formation**

196 Next, we explored the physiological function of Ser852 phosphorylation. For this purpose, we  
 197 established MDCK cell lines in which endogenous PAR3 was substituted by exogenous EGFP-fused  
 198 PAR3 and its mutants (PAR3-rescued cells). In addition, S852A, S144A, S889A, S852A/S889A  
 199 double-mutant, and S144A/S852A/S889A triple-mutant were used in comparing the function of each  
 200 site. Their expression levels were approximately 10 times greater than the endogenous level (Fig.  
 201 S5A–C). Using these cell lines, we evaluated junction formation by the calcium switch assay.  
 202 Through this analysis, we discovered that S852A and S889A mutants were distributed as puncta in  
 203 the cell–cell junction-disrupted cells (Fig. 5A,D). In several animal species, PAR3 has been observed  
 204 as puncta, and this structure was believed to be clustered PAR3 (Harris, 2017; Inaba et al., 2015;  
 205 Tabuse et al., 1998). On this basis, our result suggests that the dephosphorylation of Ser852 or  
 206 Ser889 tends to cause clusters. Supporting this notion, PAR3 clusters were also observed in  
 207 PAR3-WT-EGFP-expressing cells treated with staurosporine (Fig. S5D). These clusters merged with  
 208 aPKC, PAR6 $\beta$ , and ASPP2 but not with GP135, suggesting that these puncta are not vacuolar apical  
 209 compartments (VACs) and that these clusters contain the PAR–aPKC complex (Fig. S5D,E). Tight  
 210 junction formation, which was indicated by ZO-1 staining, was not severely disrupted in all  
 211 PAR3-rescued lines compared to that in the PAR3-knockdown cell line (Fig. 5E; Fig. S5G) (Chen  
 212 and Macara, 2006; Horikoshi et al., 2009). Although all of these PAR3-rescued lines formed almost  
 213 complete linear tight junctions at 2 h after the addition of a normal calcium medium (Fig. S5F), the  
 214 cell lines rescued by S852A, S889A, and S852A/S889A mutants exhibited an obvious defect in tight  
 215 junction formation at 30 min after the addition of the normal calcium medium compared to that in  
 216 PAR3-WT-rescued lines (Fig. 5C,E; Fig. S5G). These results indicate that phosphorylations that

function to inhibit cluster formation are essential for the early step of tight junction formation. This may be attributed to the prevention of PAR3 recruitment by the clustering-mediated restriction of molecular diffusion because an increased molecular size decreases the diffusion rate (Hofling and Franosch, 2013; Lippincott-Schwartz et al., 2001). Cell lines rescued by PAR3-S144A also exhibited a weaker defect in tight junction formation. This mutation may compromise the tight junction-inducing activity of PAR3 as discussed later.

# **Unphosphorylatable PAR3 mutants exhibited a low turnover rate in a developing cell–cell junction**

Cluster formation could alter the kinetics of PAR3. Therefore, we evaluated the turnover rate of PAR3-EGFP at cell–cell junctions by fluorescent recovery after photobleaching (FRAP). We observed that fluorescence was recovered after the bleaching process uniformly throughout the cell–cell contact, suggesting that the newly supplied PAR3-EGFP was primarily derived from the cytoplasm, not from the adjacent plasma membrane (Fig. 6A,B). There were no significant differences in the mobile fraction and the half time of recovery for PAR3-S852A in confluent cultures (see also Discussion). The half time of recovery of PAR3-2SA (852/889) appeared to be prolonged in #6 clone (Fig. 6A,C,E) but was not reproduced in #3 clone (Fig. S6A). However, in developing cell–cell junctions, the half time of recovery of both S852A and 2SA (852/889) mutants was significantly longer than that of wild-type PAR3, although no significant difference was observed in the mobile fraction (Fig. 6B,D,F; Fig. S6B). These results support the notion that the low diffusion rate of clustered PAR3 prevents efficient recruitment of PAR3 to cell–cell junctions.

# **S852A, S889A, and S852A/S889A mutants of PAR3 ectopically localize at the lateral membrane and induce the ectopic localization of tight junction components**

241 Ectopic localization of Ser151A and Ser1085A Bazooka/PAR3 mutant proteins to the lateral  
242 membrane domain was observed in *Drosophila* (Benton and St Johnston, 2003). In confluent  
243 cultures, wild-type PAR3 and its mutants primarily localized around tight junctions. However,  
244 S852A, S889A, S852A/S889A, and S144A/S852A/S889A mutants also partially localized to the  
245 lateral membrane domain (Fig. 7A). Moreover, in the cells expressing S852A, S889A, and  
246 S852A/S889A mutants, tight junction components were ectopically localized to the lateral  
247 membrane domain (Fig. 7A,B; Fig. S7A). This suggests that extension of the tight junction region  
248 was induced by the ectopically localized PAR3 mutants. When cultured for an additional 2 days,  
249 these cells organized the unique intercellular invaginated structures, which contained ZO-1 and  
250 appeared like sinuses (Fig. S7B,C). These intercellular sinuses may have been formed by the  
251 fracturing of the extended tight junction presumably because of the absence of adherens junctions,  
252 which mechanically link cell–cell contacts. This cell morphology is reminiscent of EpCAM-depleted  
253 epithelial cells (Salomon et al., 2017). Taken together, these results indicate that dysregulation of  
254 PAR3 localization leads to ectopic tight junction formation and morphological defects in the  
255 epithelial cell layer.

256

## 257 Discussion

258 In this study, we demonstrated that Ser852 of PAR3, the novel 14-3-3-binding phosphorylation site,  
259 was dephosphorylated by the ASPP2-PP1 $\alpha$  protein complex and that dephosphorylation of Ser852  
260 and Ser889 promoted the clustering of PAR3. Comparing with the wild-type PAR3, Ser852- and/or  
261 Ser889-unphosphorylatable mutants of PAR3 tended to form clusters in the cytoplasm and localize  
262 to the plasma membrane when the cell–cell junction was disrupted by calcium depletion (Fig. S5E).  
263 Furthermore, these mutants not only localized to the cell–cell contact sites but also mislocalized to  
264 the lateral membrane domain under normal culture conditions. Importantly, ectopic clustering and

ectopic membrane localization of PAR3 appeared to be concomitant. The results of the previous report from St Johnston laboratory appear to support this notion (Benton and St Johnston, 2003), i.e., unphosphorylatable mutants of Bazooka/PAR3 tended to form clusters compared with the wild-type Bazooka/PAR3, as depicted in Figure 4. Altogether, these data suggest that the so-called “localization” of PAR3 is the consequence of local clustering of PAR3 on the specific plasma membrane domain. The ASPP2–PP1 complex is efficiently recruited to the PAR3 cluster, which harbors several ASPP2-binding sites, and this would further promote ASPP2–PP1-mediated dephosphorylation of PAR3. Our results suggest that this positive feedback loop accumulates PAR3 at the specific membrane domain.

Phosphorylation of Ser852 or Ser889 renders PAR3 diffusive and easily accessible to the newly organized cell–cell junction. When it reaches the cell–cell junction by diffusion, PAR3 may be efficiently dephosphorylated by the ASPP2–PP1 complex, which has been clustered with PAR3, and oligomerize with the cluster. This mechanism may account for the observation that the turnover rates of the wild-type and unphosphorylatable mutant PAR3 were not significantly different on the mature cell–cell junction (Fig. 6E; Fig. S6A). Dephosphorylated PAR3 molecules can concentrate and exert a strong activity that promotes the formation of the tight junction and the apical domain. However, since dephosphorylated form is static in molecular turnover, it fails to coordinate the rapid reconstruction of the tight junction. Therefore, both phosphorylated and dephosphorylated states are essential for the rapid recruitment and the functional integrity of PAR3 (Fig. 8).

On the basis of our observation and previous reports, dephosphorylated PAR3 can localize to several plasma membrane domains (Benton and St Johnston, 2003; Morais-de-Sa et al., 2010). This suggests that the anchoring molecules for PAR3 are not restricted to the tight junction region. Considering this, among the several reported PAR3-binding proteins and lipids, ubiquitously distributed lipids are preferable candidate for the major membrane-anchoring factors. On this basis,

289 Ser852 and Ser889 double-phosphorylated PAR3 can also associate with the membrane-anchoring  
 290 factors, although the interaction is unstable and transient because of the lack of clustering  
 291 competency. In our hypothesis, the site where PAR3 clusters is fundamentally important for PAR3  
 292 localization. This may be defined by the competition between the phosphorylations by the kinases  
 293 phosphorylating Ser852 and Ser889 and the dephosphorylation by the ASPP2–PP1 complex engaged  
 294 to the PAR3–protein cluster. Ser852 kinases may include PAR-1 (Fig. 2F–H). The other kinases,  
 295 which may also localize to the basolateral membrane domain, should be identified in future studies.  
 296 Because the effects of Ser852 and Ser889 phosphorylation on clustering were similar, they appeared  
 297 to be functionally redundant. However, dephosphorylation of Ser852 was primarily mediated by PP1  
 298 in contrast to Ser889, which was reported to be primarily regulated by PP2A (Krahn et al., 2009).  
 299 Thus, their upstream regulations are different, and the regulations of these sites may be  
 300 context-dependent. In our observation, the involvement of Ser144 phosphorylation in clustering was  
 301 not significant. However, the S144A mutant failed to rescue tight junction formation after the  
 302 calcium switch, and the addition of S144A mutation abrogated the ectopic tight junction-inducing  
 303 activity of PAR3-S852A/S889A (Fig. 5; Fig. 7). These results suggest that the phosphorylation of  
 304 Ser144 somehow positively regulates tight junction formation, although the precise mechanisms  
 305 remain unknown.  
 306 The mechanism by which the phosphorylation of Ser852 and Ser889 regulates clustering remains  
 307 unclear. Ser852 and Ser889 are located in the C-terminal half of PAR3, although the oligomerization  
 308 domain is located at its N-terminus (Mizuno et al., 2003). The structure of the PAR3 N-terminal  
 309 domain was revealed by NMR, and the higher order structure of oligomerized PAR3 N-terminal  
 310 domain was also analyzed. The oligomers showed filamentous structure, which is supposed to be  
 311 formed by the front-to-back interaction mediated by both type I and type II PB1-like domains of the  
 312 monomers (Feng et al., 2007; Zhang et al., 2013). Although the PAR3 N-terminal domain can form

313 filamentous oligomers by itself, the front-to-back type of interaction alone cannot appear to organize  
314 massive clusters that were observed in cells. Hence, it is plausible that other molecules bind to PAR3  
315 and bridge PAR3 oligomers (Harris, 2017) and that the phosphorylation of Ser852 and Ser889 would  
316 be involved in the regulation of this interaction.

317 Clustering of PAR3 has been broadly observed in several animal species. PAR3 clusters anchored  
318 centrosomes to the apical domain in the intestinal cells of *C. elegans* and germline stem cells of male  
319 *Drosophila* (Feldman and Priess, 2012; Inaba et al., 2015). In *C. elegans* oocytes, clustering  
320 contributes to the efficient transport of PAR3 to the anterior cortex (Rodriguez et al., 2017; Wang et  
321 al., 2017). Ser852 is likely conserved among chordates (Fig. 2E). Although the conservation of S852  
322 in other species is unclear, Ser889 appears to be highly conserved among animal species (Fig. S2B).  
323 Thus, phosphorylation may be involved in the regulation of PAR3 clustering in several biological  
324 processes of various animal species. Interestingly, it has been reported that plasma membrane  
325 tension promotes the clustering of PAR3 in *C. elegans* (Wang et al., 2017). In epithelial cells, PAR3  
326 is localized to the cell-cell junction, which is subjected to mechanical stress exerted by  
327 circumferential actin belts. On the basis of these facts, it can be speculated that dephosphorylation of  
328 PAR3 might be regulated by mechanosensing.

329

## 330 **Materials and methods**

331

### 332 **Cell culture, calcium switch, and drug treatment**

333 MDCK II cells and HEK293T cells were cultured in Dulbecco's modified Eagle medium-low  
334 glucose supplemented with 10% fetal bovine serum and 100 U/mL penicillin/streptomycin at 37°C  
335 in a humidified atmosphere containing 5% CO<sub>2</sub>. For immunofluorescence of polarized epithelial  
336 cells,  $1 \times 10^5$  MDCK cells were cultured on permeable filters (Transwell 3460, Corning) for 4 days.

337 Calcium switch assays were performed as previously described (Yamanaka et al., 2006). Briefly,  $1 \times$   
338  $10^5$  MDCK cells were cultured for 3 days to reach confluency. These cells were then incubated in a  
339 low-calcium (3  $\mu$ M) medium for 18 h. Then, the medium was changed to a normal growth medium  
340 to initiate junction formation. Tautomycetin was obtained from Tocris, and calyculin A was procured  
341 from Cell Signaling Technology.

342

### 343 **Expression vectors, small interfering RNAs, transfection, and establishment of transformant** 344 **cell lines**

345 V5-human ASPP2 full-length and fragments were amplified from V5-ASPP2-SR by PCR (Cong et  
346 al., 2010) and were subcloned into pEB6-CAG (Tanaka et al., 1999). sPAR3-SRHis, a  
347 His-T7-Xpress-tagged mouse sPAR3-expressing vector, has been described earlier (Mizuno et al.,  
348 2003). sPAR3 and long form rat PAR3 were subcloned into pCAG-GS-neo (Izumi et al., 1998;  
349 Yamashita et al., 2015) with EGFP sequence to generate sPAR3-EGFP and PAR3-EGFP expression  
350 vectors, respectively. The EGFP sequence was amplified by PCR using pEGFP-N1 (Clontech) as a  
351 template. All point mutants were generated by PCR-based site-directed mutagenesis.  
352 pcDNA-HA-LATS2 was a kind gift from Dr. Hiroshi Sasaki (Ota and Sasaki, 2008). MDCK cells  
353 and HEK293T cells were transfected with plasmids using Lipofectamine 2000 and Lipofectamine  
354 LTX (Invitrogen), respectively. ASPP2 siRNA1 #2315 and siRNA2 #3326 have been described  
355 previously (Cong et al., 2010). ASPP2 siRNA1 was used unless otherwise indicated. MDCK cells  
356 were transfected with siRNAs using Lipofectamine RNAiMAX (Invitrogen). The  
357 MDCK-transformant clones expressing nonsilencing shRNA or shRNA for ASPP2 have been  
358 described previously (Cong et al., 2010). The puromycin-resistant MDCK PAR3 knockdown clone  
359 (25a) and the nonsilencing control clone (1-5) were used in establishing PAR3-EGFP-rescued clones  
360 and EGFP-expressing control clones (#21 and #22), respectively (Yamanaka et al., 2006). To

361 establish these clones, PAR3-EGFP-pCAG-GS-neo and its point mutants were transfected to  
362 PAR3-knockdown cells and selected in the 800 µg/mL G418-containing medium.

363

# **364 Antibodies**

365 The rabbit anti-ASPP2 antibodies C2AP and C3AP have been described previously (Cong et al.,  
366 2010). Anti-phospho-PAR3 Ser827 has also been described previously (Nagai-Tamai et al., 2002).  
367 The antibodies specific for PAR3 phosphorylated on Serine 852 and 889 were raised by  
368 immunization of rabbits with the keyhole limpet hemocyanin-conjugated phosphopeptides  
369 KSKpSMDLGIC and KSSpSLESLQC, respectively, and were affinity-purified. Anti-GST has been  
370 described previously (Izumi et al., 1998). Anti-PAR3 (07-330, Upstate), anti-T7 (69522, Novagen),  
371 and anti-PP2Ac (05-421, Upstate) were purchased from Merck Millipore. Omni probe,  
372 anti-His-T7-Xpress-tag, (sc-7270 and sc-499), anti-PP1α (sc-7482), anti-pan 14-3-3 (sc-629),  
373 anti-aPKC (sc-216), anti-PAR6β (sc-67392), anti-ZO-1 (sc-33725), and normal rabbit IgG (sc-2027)  
374 were purchased from Santa Cruz Biotechnology. Anti-V5 (R960-25), anti-claudin1 (71-7800), and  
375 anti-occludin (71-1500) were procured from Invitrogen. Anti-phospho-aPKCζ Thr410 (9378),  
376 anti-myosin light chain 2 (3672), anti-phospho-myosin light chain 2 (3674), anti-phospho-Ser  
377 14-3-3-binding motif (9606), and anti-phospho-threonine (9386) were obtained from Cell Signaling  
378 Technology. Anti-aPKC (610176) and anti-E-cadherin (610181) were purchased from BD  
379 BioScience. Anti-GAPDH (ab8245) was obtained from abcam, anti-YAP1 (H00010413-M01) was  
380 purchased from Abnova, anti-GFP (598) was procured from MBL, and anti-HA (3F10) was obtained  
381 from Roche.

382

# **383 Immunofluorescence and quantification of fluorescent signals**

384 Cells were fixed with 2% paraformaldehyde in PBS and permeabilized with 0.5% Triton X-100 in



385 PBS. After incubation with a primary antibody, cells were stained with Alexa Fluor-conjugated  
386 secondary antibodies (Invitrogen). F-actin was stained with rhodamine-phalloidin. Images were  
387 obtained using an epifluorescent microscope (AxioImager, Carl Zeiss) or a confocal laser scanning  
388 microscope system (LSM700, Carl Zeiss). The ImageJ software was used for the quantification of  
389 fluorescent signals. Regions of interest (ROIs) were defined as described in Fig. S1B and Fig. S4.

390

### 391 **Immunoprecipitation and far-western blotting**

392 HEK293T or MDCK cells were lysed in a buffer containing 25 mM Tris-HCl (pH 7.5), 140 mM  
393 NaCl, 2.5 mM MgCl<sub>2</sub>, 1 mM ethylene glycol tetraacetic acid, 0.5% Triton X-100, Complete protease  
394 inhibitor cocktail (Roche), and PhosSTOP phosphatase inhibitor cocktail (Roche). After  
395 centrifugation, the supernatants were subjected to immunoprecipitation with the indicated antibodies,  
396 followed by SDS-PAGE and western blotting. His-T7-Xpress-tagged PAR3 mutants were  
397 immunoprecipitated by T7 antibody, separated by SDS-PAGE, and then transferred to a  
398 polyvinylidene difluoride membrane. For probing by 14-3-3, the membrane was soaked in a  
399 denature buffer (50 mM Tris-HCl, pH 8.3, 7 M guanidine, 50 mM dithiothreitol, 2 mM EDTA) for 1  
400 h and then renatured in a renature buffer (20 mM Tris-HCl, pH 7.4, 140 mM NaCl, 4 mM  
401 dithiothreitol, 1 mM MgCl<sub>2</sub>, 10 μM ZnCl<sub>2</sub>, 0.1% bovine serum albumin, 0.1% Nonidet P-40) at 4°C  
402 for 4 h. After blocking with 4% skim milk in the renature buffer for 4 h, the membrane was  
403 incubated with 10 μg/mL of GST-14-3-3ζ in the renature buffer at 4°C overnight and then subjected  
404 to immunoblotting using an anti-GST antibody.

405

### 406 **FRAP analysis**

407 Time-lapse imaging was performed using a confocal microscopy system (Axio imager and LSM700,  
408 Carl Zeiss) equipped with a 40× dipping objective (Carl Zeiss) and a culture chamber (INUG2-UK,

409 Tokai Hit).

410 Cells were maintained at 37°C in FluoroBrite DMEM (Gibco) supplemented with 10% FBS under  
411 5% CO<sub>2</sub> conditions. ROIs were set on cell–cell contacts, where PAR3-EGFP is concentrated.  
412 Fluorescence of EGFP was bleached by a 100% power laser and measured by a 0.5% power laser.  
413 Images were obtained every 10 s. The fluorescence intensity immediately after bleaching was  
414 considered as the background level, and the half time of recovery ( $t_{1/2}$ ) was calculated by  
415 curve-fitting to the equation  $I(t) = I_{\max} \cdot (1 - e^{-kt})$ , where  $k = \ln 2 / t_{1/2}$ , using the Solver tool of Excel  
416 (Microsoft).

417

#### 418 **In vitro kinase assay and in vitro dephosphorylation assay**

419 The kinase assay was performed as previously described (Yamashita et al., 2010).  
420 His-T7-Xpress-tagged PAR-1b was overexpressed in COS1 cells and immunoprecipitated by anti-T7  
421 and then used as the kinase source in this experiment. For the in vitro dephosphorylation assay, the  
422 substrate PAR3 was immunoprecipitated from confluent cultured MDCK cells using anti-PAR3  
423 antibody. Beads-immobilized substrate was washed with PMP buffer (50 mM HEPES, pH 7.5, 100  
424 mM NaCl, 2 mM DTT, 0.01% Brij 35, 1 mM MnCl<sub>2</sub>), and PP1 $\alpha$  (New England Biolab) was added  
425 and incubated for 30 min at 30°C. Then, the phosphorylation levels of PAR3 were analyzed by  
426 western blotting.

427

#### 428 **Statistical analysis**

429 Differences were considered statistically significant when  $p < 0.05$  as assessed using the Student's  
430 *t*-test. Single asterisk and double asterisks denote  $p < 0.05$  and  $p < 0.01$ , respectively. The results are  
431 presented as mean  $\pm$  standard deviation (SD).

432

433 **Acknowledgments**

434 We thank Dr. H. Sasaki for providing the materials and the members of Ohno laboratories for their  
435 helpful comments.

436

437 **Competing interests**

438 The authors declare no competing or financial interests.

439

440 **Author contributions**

441 Conceptualization: K. Yamashita, K. Mizuno, and S. Ohno. Experiments and data analysis: K.  
442 Yamashita, K. Mizuno, K. Furukawa, H. Hirose, M. Masuda-Hirata, N. Sakurai, Y. Amano, and A.  
443 Suzuki. Funding acquisition: S. Ohno, K. Yamashita, and K. Mizuno. Original draft: K. Yamashita  
444 and K. Mizuno. Writing review and editing: T. Hirose and S. Ohno.

445

446 **Funding**

447 This work was supported in part by the grant for Creation of Innovation Centers for Advanced  
448 Interdisciplinary Research Areas Program from the Ministry of Education, Culture, Sports, Science  
449 and Technology of Japan (to S.O.), JSPS KAKENHI (JP23112003 to S.O., JP13670129 to K.M., and  
450 JP17K17991 to K.Y.), and the Yokohama Foundation for Advancement of Medical Science (K.Y.).

451

452

453 **Figure Legends**

454

455 **Fig. 1. ASPP2 is necessary for the interaction between PAR3 and PP1 $\alpha$ , and the interaction**  
456 **between ASPP2 and PP1 $\alpha$  is necessary for PAR3 localization.**

457 (A) MDCK cells were transfected with nonsilencing siRNA and siRNA for ASPP2. Then,  
 458 immunoprecipitation was performed using anti-PAR3 or normal rabbit IgG. ASPP2 depletion  
 459 decreased the coimmunoprecipitation of PP1 $\alpha$  with PAR3 (long and short). (B) A schematic  
 460 representation of the domain structure of ASPP2, its deletion mutants, and point mutants. (C)  
 461 Interactions between ASPP2 mutants and PP1 $\alpha$  or YAP were evaluated by immunoprecipitation.  
 462 ASPP2 mutants were exogenously expressed in HEK293T cells. (D) Interactions between ASPP2  
 463 mutants and LATS2 or PP1 $\alpha$  were tested by immunoprecipitation. (E) V5-ASPP2-WT or  
 464 V5-ASPP2-REVD mutants were expressed in the ASPP2-knockdown MDCK cell line. Rescue of  
 465 PAR3 localization was assessed. Asterisks indicate V5-ASPP2-expressing cells. (F) Quantification of  
 466 the fluorescence intensity of PAR3-staining in the tight junction region (approximately 20 cells were  
 467 measured in each sample, and four photos in two independent experiments were quantified (n = 4)).  
 468 The precise method is described in Fig. S1B. Scale bar represents 20  $\mu$ m.

469

470 **Fig. 2. Characterization of PAR3 phosphorylation: Ser852 is a novel phosphorylation site that**  
 471 **is important for 14-3-3 binding.**

472 (A) A schematic representation of the domain structure of full-length PAR3, sPAR3 (short isoform),  
 473 and its deletion mutants. (B) Deletion mutants of PAR3 were immunoprecipitated and analyzed by  
 474 western blotting and far-western blotting using GST-14-3-3 $\zeta$  as a probe. Asterisks indicate  
 475 nonspecific signals. Duplicated experiments were performed. (C) PAR3 and PAR3- $\Delta$ 827-856  
 476 deletion mutants were immunoprecipitated and analyzed by far-western blotting. (D) PAR3 and its  
 477 point mutants were immunoprecipitated and analyzed by western blotting and far-western blotting.  
 478 Both 852nd and 889th serines were changed to alanines in the 2SA mutant. (E) Sequence alignment  
 479 around Ser852 of PAR3. Magenta indicates Ser852, and blue, yellow, and gray indicate basic, acidic,  
 480 and other common amino acids, respectively. Ser852 appears to be conserved among chordates, but

not certainly among metazoans. (F) In vitro kinase assay using immunoprecipitated PAR1b as a kinase source and GST-fused PAR3 fragment as a substrate. Open star indicates the phosphorylation of GST-PAR3<sub>842-876</sub>, and phosphorylation was not observed in the S852A mutant. GST-tau peptide was used as a positive control (closed star). The arrowhead indicates the autophosphorylation of PAR-1b. (G) HEK293T cells were transfected with each indicated plasmid. Phosphorylations of PAR3 by PAR1b-overexpression were evaluated. Phosphorylation of Ser144 was monitored using the 14-3-3-binding consensus motif antibody. Omni-probe antibody recognizes a part of His-T7-Xpress tags (HTX) as an epitope. The lysate of PAR3- and PAR1b-overexpressed cells (lane 5) was diluted for the quantitative comparison (lanes 3 and 4). Mobility shift of V5-tagged spectrin repeats 8 and 9 of utrophin was used as a positive control of PAR1b-mediated phosphorylation (Yamashita et al., 2010). (H) HEK293T cells were transfected with each indicated plasmid. Promotion of PAR3 phosphorylation by PAR1b-overexpression and the inhibitory effect of MKI on PAR-1b were evaluated. EGFP-MKI almost completely inhibited PAR1b overexpression-mediated phosphorylations (lanes 3 and 4), whereas it did not inhibit the endogenous phosphorylation of PAR3 (lanes 1 and 2).

496

### 497 **Fig. 3. ASPP2 and PP1 $\alpha$ negatively regulate the phosphorylation level of Ser852 in PAR3.**

498 (A) MDCK cells were transfected with each indicated siRNA, and whole cell lysates were analyzed.  
499 The dilution series of the lysate from ASPP2 siRNA1-transfected cells was prepared for the  
500 quantification of Ser852 phosphorylation. (B) Quantification of the phosphorylation levels of Ser852  
501 in experiment A (n = 3). The signal intensity of S852P was normalized by the signal intensity of total  
502 PAR3. (C) PAR3 was immunoprecipitated from cells that were transfected with each siRNA. Then,  
503 the phosphorylation levels and the coimmunoprecipitation with interacting proteins were analyzed.  
504 To evaluate the phosphorylation levels of S144, S827, and S889, immunopurified PAR3 was

505 analyzed. (D) Quantification of the phosphorylation levels of PAR3 or coimmunoprecipitation in  
 506 experiment C (n = 3). (E) PAR3 was immunopurified from MDCK cells, and recombinant PP1 $\alpha$  was  
 507 treated. After incubation, the phosphorylation levels of Ser852 were assayed by western blotting. (F)  
 508 Quantification of Ser852 phosphorylation in experiment E (n = 3). (G) MDCK cells were treated  
 509 with calyculin A and tautomycetin (TMC) for 1 h using DMSO as a vehicle. Treatment with both  
 510 calyculin A and tautomycetin promoted the phosphorylation of PAR3 Ser852 and myosin regulatory  
 511 light chain (2P-MLC), whereas only calyculin A promoted the phosphorylation of  
 512 aPKC $\lambda/\zeta$ -Thr412/410. (H) Quantification of Ser852 phosphorylation in experiment G (n = 3).

513

514 **Fig. 4. PAR3-S852A strongly localized to the tight junction region irrespective of ASPP2**  
 515 **expression.**

516 (A) MDCK cells stably expressing nonsilencing shRNA and MDCK cells stably expressing ASPP2  
 517 shRNA were transfected with His-T7-Xpress-tagged sPAR3 wild-type or S852A mutant.  
 518 Immunofluorescence staining was performed, and samples were observed by confocal microscopy.  
 519 The percentage of tight junction region-localized PAR3 in total PAR3 was compared. To achieve this,  
 520 we prepared the sum projection of X–Y sections where ZO-1-staining was positive (left) and the sum  
 521 projection of all X–Y sections (right). Because most of overexpressed sPAR3 overflowed in the  
 522 cytoplasm (asterisk), we quantified only the cells expressing low level of sPAR3 by thresholding the  
 523 intensity. (B) Signal intensities of these images were quantified (approximately 15 cells were  
 524 measured in each sample, and six photos in two independent experiments were quantified (n = 6)).  
 525 The precise method is described in Fig. S4. (C) MDCK cells were treated with staurosporine for 2 h  
 526 at 37°C. Then, the phosphorylation level of Ser852 was evaluated by western blotting. (D)  
 527 sPAR3-EGFP stably expressing MDCK cells were treated with 1  $\mu$ M staurosporine for 30 min at  
 528 37°C, and localization of sPAR3-EGFP was analyzed. Scale bars represent 20  $\mu$ m.

529

530 **Fig. 5. PAR3-S852A and S889A mutants organized ectopic protein clusters and failed to rescue**  
 531 **the rapid recovery of ZO-1-staining in calcium switch assay.**

532 (A) Wild-type PAR3 and its point mutants were fused with EGFP and stably expressed in the  
 533 PAR3-knockdown MDCK cell line. These transformant MDCK cell lines were cultured in  
 534 low-calcium medium for 18 h. Then, immunofluorescence was performed. One confocal section is  
 535 displayed. (B) Maximum intensity projection (MIP) of confocal sections in (A). (C) After treatment  
 536 with low-calcium medium, cells were cultured in normal calcium medium for 30 min. The MIP of  
 537 immunofluorescent confocal sections is displayed. (D) After treatment with low-calcium medium for  
 538 18 h, cells positive for punctate PAR3-EGFP staining were counted (at least 50 cells were counted in  
 539 each sample in one experiment, with three independent experiments (n = 3)). (E) After 30 min of  
 540 calcium switch, ZO-1-staining was evaluated as an indicator of tight junction maturation. The  
 541 percentage of cells whose surrounding ZO-1-staining was longer than half the cell perimeter was  
 542 determined (at least 200 cells were counted in each sample in one experiment, with three  
 543 independent experiments (n = 3)). More precise quantification is described in Fig. S5G. 2SA  
 544 indicates S852A/S889A double-mutant. Scale bars represent 20  $\mu$ m.

545

546 **Fig. 6. FRAP analysis of PAR3 and its unphosphorylatable mutants in cell-cell junctions.**

547 (A) PAR3-EGFP-rescued cell lines were confluent cultured in normal calcium medium and  
 548 subjected to FRAP assay. Bleaching was performed at time 0. Red rectangles represent ROIs. (B)  
 549 After calcium switch, cells were cultured for 2 h. Then, they were subjected to FRAP assay. (C)  
 550 Average values of relative fluorescence intensities in experiment A were plotted (at least 10 ROIs  
 551 were measured in each sample in three independent experiments). (D) Average values of relative  
 552 fluorescence intensities in experiment B were plotted. (E) Average values of mobile fraction and half

time of recovery in experiment A were plotted. (F) Average values of mobile fraction and half time of recovery in experiment B were plotted.

**Fig. 7. Localization of PAR3 and its unphosphorylatable mutants in PAR3-rescued MDCK cell lines.**

(A) PAR3-rescued cell lines were cultured for 4 days (reached confluence at day 2). Immunostained samples were analyzed by confocal microscopy. Arrows on reconstituted X–Z sections indicate Z-positions of displayed upper X–Y planes, and arrowheads on the X–Z section indicate Z-positions of displayed middle X–Y planes. Arrows and arrowheads on upper and middle X–Y planes indicate where X–Z sections reconstituted. (B) The percentage of cells exhibiting ectopic ZO-1-staining in the lower half of the cell height was determined (at least 100 cells were counted in each sample in one experiment, with three independent experiments (n = 3)). 2SA and 3SA indicate S852A/S889A double-mutant and S144/S852/S889 triple-mutant, respectively.

**Fig. 8. Rapid and proper localization of PAR3 is achieved by the phosphorylation–dephosphorylation cycle.**

Phosphorylation of Ser852 and Ser889 residues permits the diffusion of PAR3 through association with 14-3-3, whereas their dephosphorylation promotes the clustering of PAR3. Both phosphorylation and dephosphorylation are essential for rapid recruitment and accumulation at specific sites of the membrane such as the cell–cell contact sites (yellow arrow). The balance between kinases localizing at the lateral membrane, possibly PAR1, and phosphatases, including PP1 that is associated with PAR3 through ASPP2, may determine the site where PAR3 accumulates.



# References

- Benton, R. and St Johnston, D. (2003). Drosophila PAR-1 and 14-3-3 inhibit Bazooka/PAR-3 to establish complementary cortical domains in polarized cells. *Cell* **115**, 691-704.
- Betschinger, J., Mechtler, K. and Knoblich, J. A. (2003). The Par complex directs asymmetric cell division by phosphorylating the cytoskeletal protein Lgl. *Nature* **422**, 326-30.
- Chen, X. and Macara, I. G. (2005). Par-3 controls tight junction assembly through the Rac exchange factor Tiam1. *Nat Cell Biol* **7**, 262-9.
- Chen, X. and Macara, I. G. (2006). Par-3 mediates the inhibition of LIM kinase 2 to regulate cofilin phosphorylation and tight junction assembly. *J Cell Biol* **172**, 671-8.
- Cong, W., Hirose, T., Harita, Y., Yamashita, A., Mizuno, K., Hirano, H. and Ohno, S. (2010). ASPP2 regulates epithelial cell polarity through the PAR complex. *Curr Biol* **20**, 1408-14.
- Drewes, G., Ebner, A., Preuss, U., Mandelkow, E. M. and Mandelkow, E. (1997). MARK, a novel family of protein kinases that phosphorylate microtubule-associated proteins and trigger microtubule disruption. *Cell* **89**, 297-308.
- Ebner, K., Suzuki, A., Horikoshi, Y., Hirose, T., Meyer Zu Brickwedde, M. K., Ohno, S. and Vestweber, D. (2001). The cell polarity protein ASIP/PAR-3 directly associates with junctional adhesion molecule (JAM). *EMBO J* **20**, 3738-48.
- Egloff, M. P., Johnson, D. F., Moorhead, G., Cohen, P. T., Cohen, P. and Barford, D. (1997). Structural basis for the recognition of regulatory subunits by the catalytic subunit of protein phosphatase 1. *EMBO J* **16**, 1876-87.
- Etemad-Moghadam, B., Guo, S. and Kempf, K. J. (1995). Asymmetrically distributed PAR-3 protein contributes to cell polarity and spindle alignment in early C. elegans embryos. *Cell* **83**, 743-52.
- Feldman, J. L. and Priess, J. R. (2012). A role for the centrosome and PAR-3 in the hand-off of MTOC function during epithelial polarization. *Curr Biol* **22**, 575-82.
- Feng, W., Wu, H., Chan, L. N. and Zhang, M. (2007). The Par-3 NTD adopts a PB1-like structure required for Par-3 oligomerization and membrane localization. *EMBO J* **26**, 2786-96.
- Fletcher, G. C., Lucas, E. P., Brain, R., Tournier, A. and Thompson, B. J. (2012). Positive feedback and mutual antagonism combine to polarize Crumbs in the Drosophila follicle cell epithelium. *Curr Biol* **22**, 1116-22.

611 Harris, T. J. and Peifer, M. (2005). The positioning and segregation of apical  
612 cues during epithelial polarity establishment in *Drosophila*. *J Cell Biol* **170**, 813-23.

613 Harris, T. J. C. (2017). Protein clustering for cell polarity: Par-3 as a paradigm.  
614 *F1000Res* **6**, 1620.

615 Helps, N. R., Barker, H. M., Elledge, S. J. and Cohen, P. T. (1995). Protein  
616 phosphatase 1 interacts with p53BP2, a protein which binds to the tumour suppressor p53.  
617 *FEBS Lett* **377**, 295-300.

618 Hirose, T., Izumi, Y., Nagashima, Y., Tamai-Nagai, Y., Kurihara, H., Sakai, T.,  
619 Suzuki, Y., Yamanaka, T., Suzuki, A., Mizuno, K. et al. (2002). Involvement of ASIP/PAR-3  
620 in the promotion of epithelial tight junction formation. *J Cell Sci* **115**, 2485-95.

621 Hofling, F. and Franosch, T. (2013). Anomalous transport in the crowded world  
622 of biological cells. *Rep Prog Phys* **76**, 046602.

623 Horikoshi, Y., Hamada, S., Ohno, S. and Suetsugu, S. (2011). Phosphoinositide  
624 binding by par-3 involved in par-3 localization. *Cell Struct Funct* **36**, 97-102.

625 Horikoshi, Y., Suzuki, A., Yamanaka, T., Sasaki, K., Mizuno, K., Sawada, H.,  
626 Yonemura, S. and Ohno, S. (2009). Interaction between PAR-3 and the aPKC-PAR-6 complex  
627 is indispensable for apical domain development of epithelial cells. *J Cell Sci* **122**,  
628 1595-606.

629 Hurd, T. W., Fan, S., Liu, C. J., Kweon, H. K., Hakansson, K. and Margolis, B.  
630 (2003). Phosphorylation-dependent binding of 14-3-3 to the polarity protein Par3 regulates  
631 cell polarity in mammalian epithelia. *Curr Biol* **13**, 2082-90.

632 Inaba, M., Venkei, Z. G. and Yamashita, Y. M. (2015). The polarity protein Baz  
633 forms a platform for the centrosome orientation during asymmetric stem cell division in  
634 the *Drosophila* male germline. *Elife* **4**.

635 Izumi, Y., Hirose, T., Tamai, Y., Hirai, S., Nagashima, Y., Fujimoto, T., Tabuse,  
636 Y., Kempfues, K. J. and Ohno, S. (1998). An atypical PKC directly associates and  
637 colocalizes at the epithelial tight junction with ASIP, a mammalian homologue of  
638 *Caenorhabditis elegans* polarity protein PAR-3. *J Cell Biol* **143**, 95-106.

639 Kempfues, K. J., Priess, J. R., Morton, D. G. and Cheng, N. S. (1988).  
640 Identification of genes required for cytoplasmic localization in early *C. elegans* embryos.  
641 *Cell* **52**, 311-20.

642 Knoblich, J. A. (2001). Asymmetric cell division during animal development. *Nat*  
643 *Rev Mol Cell Biol* **2**, 11-20.

644 Krahn, M. P., Egger-Adam, D. and Wodarz, A. (2009). PP2A antagonizes  
645 phosphorylation of Bazooka by PAR-1 to control apical-basal polarity in dividing embryonic  
646 neuroblasts. *Dev Cell* **16**, 901-8.

647           Krahn, M. P., Klopfenstein, D. R., Fischer, N. and Wodarz, A. (2010). Membrane  
648           targeting of Bazooka/PAR-3 is mediated by direct binding to phosphoinositide lipids. *Curr*  
649           *Biol* **20**, 636-42.

650           Lippincott-Schwartz, J., Snapp, E. and Kenworthy, A. (2001). Studying protein  
651           dynamics in living cells. *Nat Rev Mol Cell Biol* **2**, 444-56.

652           Liu, C. Y., Lv, X., Li, T., Xu, Y., Zhou, X., Zhao, S., Xiong, Y., Lei, Q. Y.  
653           and Guan, K. L. (2011). PP1 cooperates with ASPP2 to dephosphorylate and activate TAZ.  
654           *J Biol Chem* **286**, 5558-66.

655           Mitsubishi, S., Matsuura, N., Ubukata, M., Oikawa, H., Shima, H. and Kikuchi,  
656           K. (2001). Tautomycin is a novel and specific inhibitor of serine/threonine protein  
657           phosphatase type 1, PP1. *Biochem Biophys Res Commun* **287**, 328-31.

658           Mizuno, K., Suzuki, A., Hirose, T., Kitamura, K., Kutsuzawa, K., Futaki, M., Amano,  
659           Y. and Ohno, S. (2003). Self-association of PAR-3-mediated by the conserved N-terminal  
660           domain contributes to the development of epithelial tight junctions. *J Biol Chem* **278**,  
661           31240-50.

662           Morais-de-Sa, E., Mirouse, V. and St Johnston, D. (2010). aPKC phosphorylation  
663           of Bazooka defines the apical/lateral border in Drosophila epithelial cells. *Cell* **141**,  
664           509-23.

665           Nagai-Tamai, Y., Mizuno, K., Hirose, T., Suzuki, A. and Ohno, S. (2002). Regulated  
666           protein-protein interaction between aPKC and PAR-3 plays an essential role in the  
667           polarization of epithelial cells. *Genes Cells* **7**, 1161-71.

668           Nesic, D., Miller, M. C., Quinkert, Z. T., Stein, M., Chait, B. T. and Stebbins,  
669           C. E. (2010). Helicobacter pylori CagA inhibits PAR1-MARK family kinases by mimicking host  
670           substrates. *Nat Struct Mol Biol* **17**, 130-2.

671           Ohno, S. (2001). Intercellular junctions and cellular polarity: the PAR-aPKC  
672           complex, a conserved core cassette playing fundamental roles in cell polarity. *Curr Opin*  
673           *Cell Biol* **13**, 641-8.

674           Ota, M. and Sasaki, H. (2008). Mammalian Tead proteins regulate cell  
675           proliferation and contact inhibition as transcriptional mediators of Hippo signaling.  
676           *Development* **135**, 4059-69.

677           Rodriguez, J., Peglion, F., Martin, J., Hubatsch, L., Reich, J., Hirani, N.,  
678           Gubieda, A. G., Roffey, J., Fernandes, A. R., St Johnston, D. et al. (2017). aPKC Cycles  
679           between Functionally Distinct PAR Protein Assemblies to Drive Cell Polarity. *Dev Cell* **42**,  
680           400-415 e9.

681           Rotem, S., Katz, C. and Friedler, A. (2007). Insights into the structure and  
682           protein-protein interactions of the pro-apoptotic protein ASPP2. *Biochem Soc Trans* **35**,

966-9.

Saadat, I., Higashi, H., Obuse, C., Umeda, M., Murata-Kamiya, N., Saito, Y., Lu, H., Ohnishi, N., Azuma, T., Suzuki, A. et al. (2007). Helicobacter pylori CagA targets PAR1/MARK kinase to disrupt epithelial cell polarity. *Nature* **447**, 330-3.

Salomon, J., Gaston, C., Magescas, J., Duvauchelle, B., Canioni, D., Sengmanivong, L., Mayeux, A., Michaux, G., Campeotto, F., Lemale, J. et al. (2017). Contractile forces at tricellular contacts modulate epithelial organization and monolayer integrity. *Nat Commun* **8**, 13998.

Suzuki, A., Hirata, M., Kamimura, K., Maniwa, R., Yamanaka, T., Mizuno, K., Kishikawa, M., Hirose, H., Amano, Y., Izumi, N. et al. (2004). aPKC acts upstream of PAR-1b in both the establishment and maintenance of mammalian epithelial polarity. *Curr Biol* **14**, 1425-35.

Suzuki, A., Ishiyama, C., Hashiba, K., Shimizu, M., Ebnet, K. and Ohno, S. (2002). aPKC kinase activity is required for the asymmetric differentiation of the premature junctional complex during epithelial cell polarization. *J Cell Sci* **115**, 3565-73.

Suzuki, A. and Ohno, S. (2006). The PAR-aPKC system: lessons in polarity. *J Cell Sci* **119**, 979-87.

Tabuse, Y., Izumi, Y., Piano, F., Kempfues, K. J., Miwa, J. and Ohno, S. (1998). Atypical protein kinase C cooperates with PAR-3 to establish embryonic polarity in Caenorhabditis elegans. *Development* **125**, 3607-14.

Tanaka, J., Miwa, Y., Miyoshi, K., Ueno, A. and Inoue, H. (1999). Construction of Epstein-Barr virus-based expression vector containing mini-oriP. *Biochem Biophys Res Commun* **264**, 938-43.

Tepass, U., Tanentzapf, G., Ward, R. and Fehon, R. (2001). Epithelial cell polarity and cell junctions in Drosophila. *Annu Rev Genet* **35**, 747-84.

Traweger, A., Wiggin, G., Taylor, L., Tate, S. A., Metalnikov, P. and Pawson, T. (2008). Protein phosphatase 1 regulates the phosphorylation state of the polarity scaffold Par-3. *Proc Natl Acad Sci U S A* **105**, 10402-7.

Vigneron, A. M., Ludwig, R. L. and Voudsen, K. H. (2010). Cytoplasmic ASPP1 inhibits apoptosis through the control of YAP. *Genes Dev* **24**, 2430-9.

Wang, S. C., Low, T. Y. F., Nishimura, Y., Gole, L., Yu, W. and Motegi, F. (2017). Cortical forces and CDC-42 control clustering of PAR proteins for Caenorhabditis elegans embryonic polarization. *Nat Cell Biol* **19**, 988-995.

Yamanaka, T., Horikoshi, Y., Izumi, N., Suzuki, A., Mizuno, K. and Ohno, S. (2006). Lgl mediates apical domain disassembly by suppressing the PAR-3-aPKC-PAR-6 complex to orient apical membrane polarity. *J Cell Sci* **119**, 2107-18.

719 Yamanaka, T., Horikoshi, Y., Sugiyama, Y., Ishiyama, C., Suzuki, A., Hirose, T.,  
720 Iwamatsu, A., Shinohara, A. and Ohno, S. (2003). Mammalian Lgl forms a protein complex  
721 with PAR-6 and aPKC independently of PAR-3 to regulate epithelial cell polarity. *Curr Biol*  
722 13, 734-43.

723 Yamashita, K., Ide, M., Furukawa, K. T., Suzuki, A., Hirano, H. and Ohno, S. (2015).  
724 Tumor suppressor protein Lgl mediates G1 cell cycle arrest at high cell density by forming  
725 an Lgl-VprBP-DDB1 complex. *Mol Biol Cell* 26, 2426-38.

726 Yamashita, K., Suzuki, A., Satoh, Y., Ide, M., Amano, Y., Masuda-Hirata, M.,  
727 Hayashi, Y. K., Hamada, K., Ogata, K. and Ohno, S. (2010). The 8th and 9th tandem  
728 spectrin-like repeats of utrophin cooperatively form a functional unit to interact with  
729 polarity-regulating kinase PAR-1b. *Biochem Biophys Res Commun* 391, 812-7.

730 Yu, C. G. and Harris, T. J. (2012). Interactions between the PDZ domains of Bazooka  
731 (Par-3) and phosphatidic acid: in vitro characterization and role in epithelial  
732 development. *Mol Biol Cell* 23, 3743-53.

733 Zhang, Y., Wang, W., Chen, J., Zhang, K., Gao, F., Gao, B., Zhang, S., Dong, M.,  
734 Besenbacher, F., Gong, W. et al. (2013). Structural insights into the intrinsic  
735 self-assembly of Par-3 N-terminal domain. *Structure* 21, 997-1006.

736

737

738

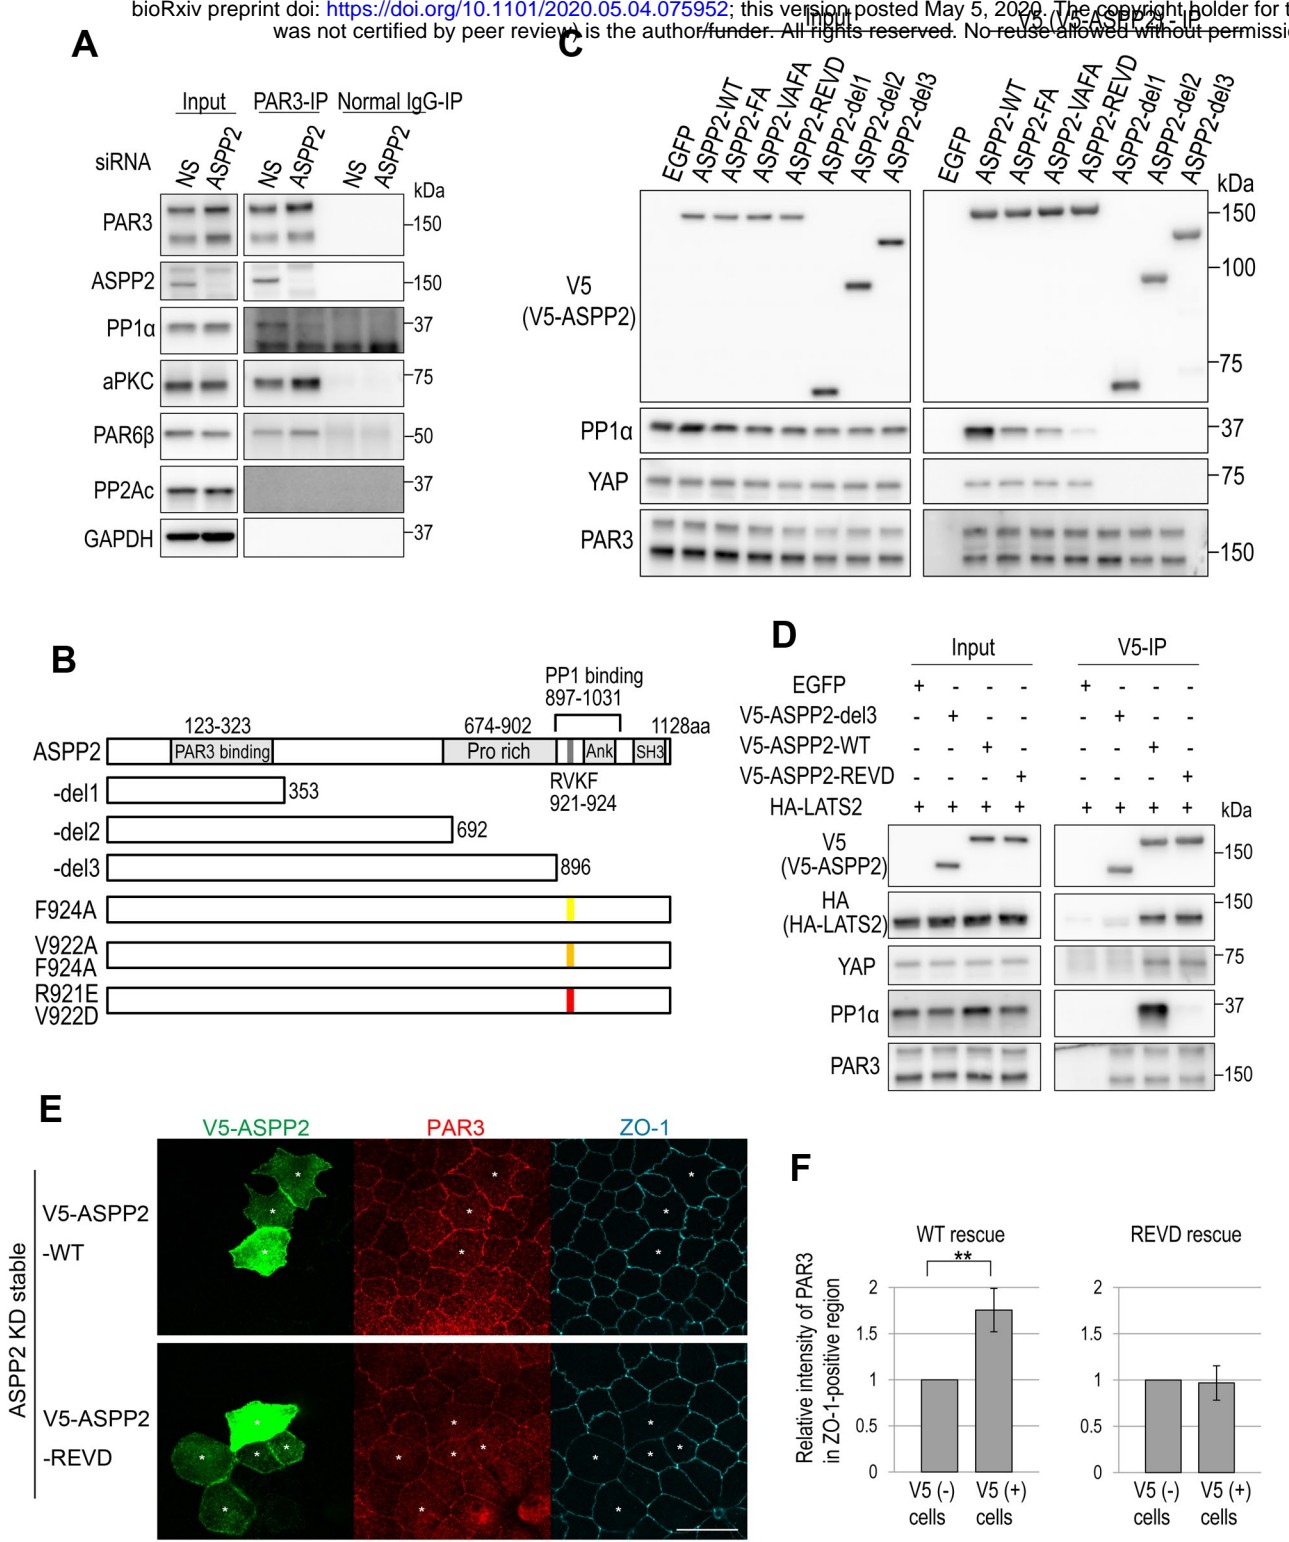

Figure 1. Yamashita K et al.

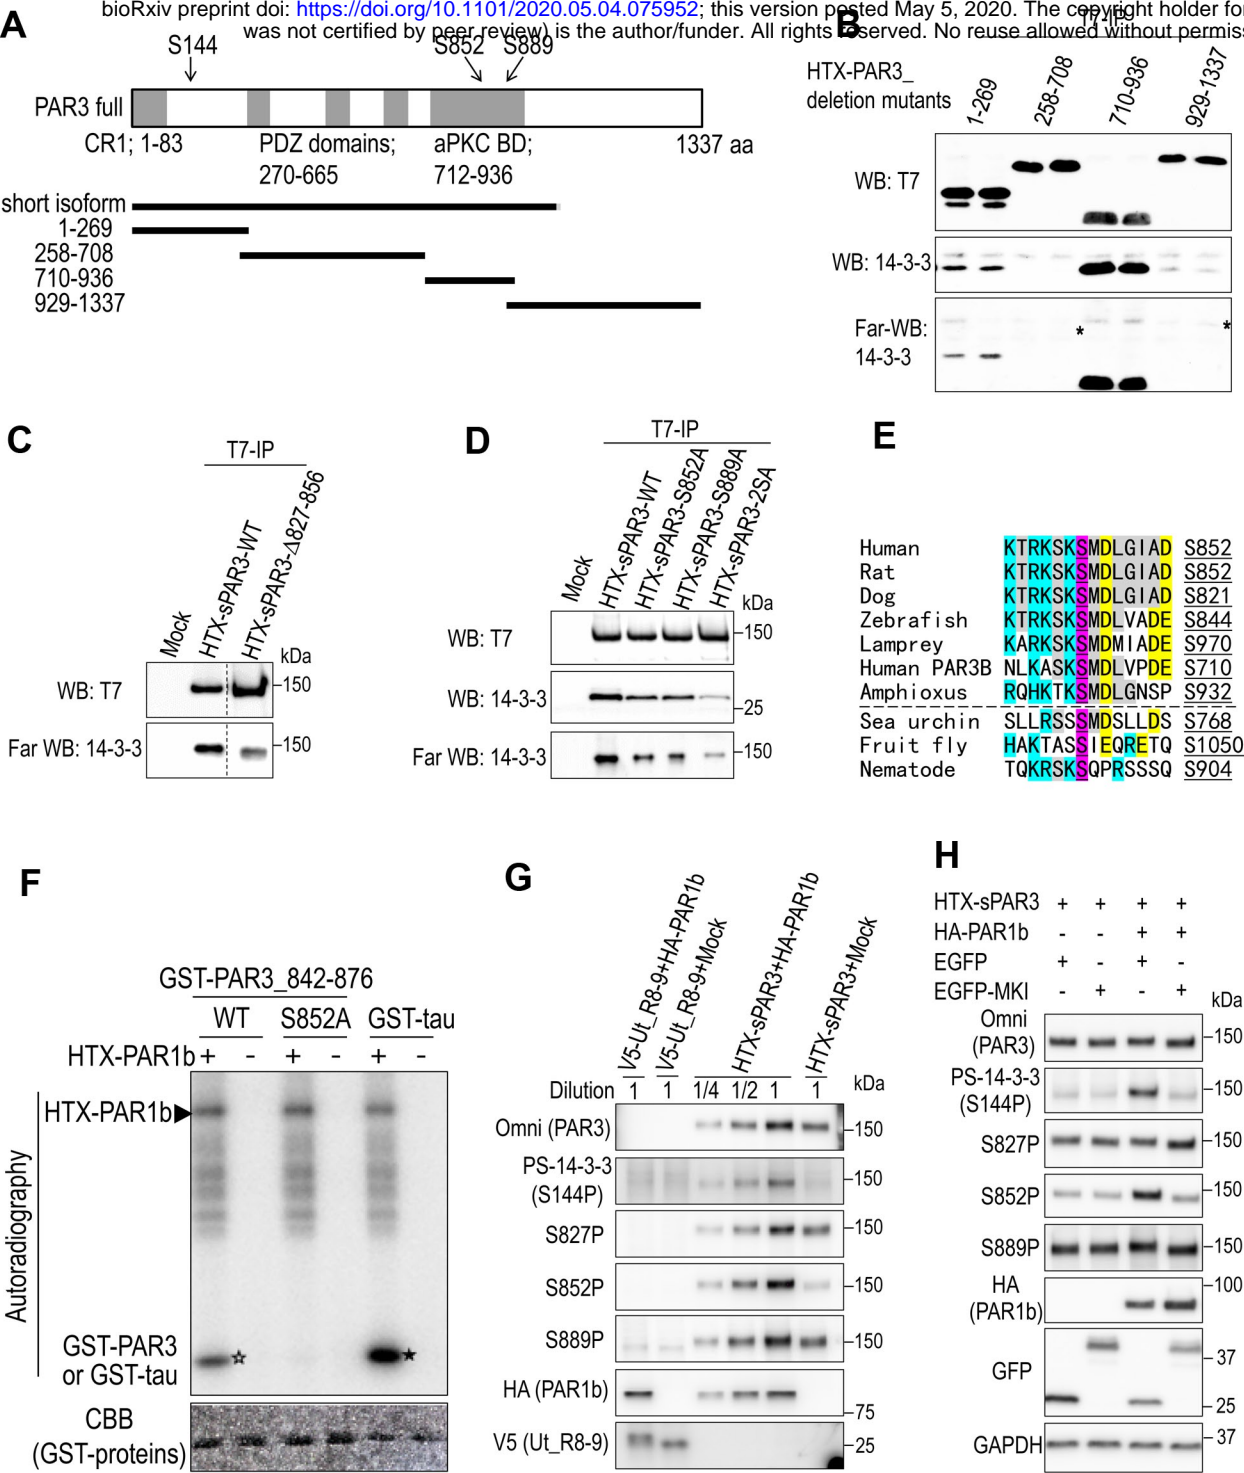

Figure 2. Yamashita K et al.

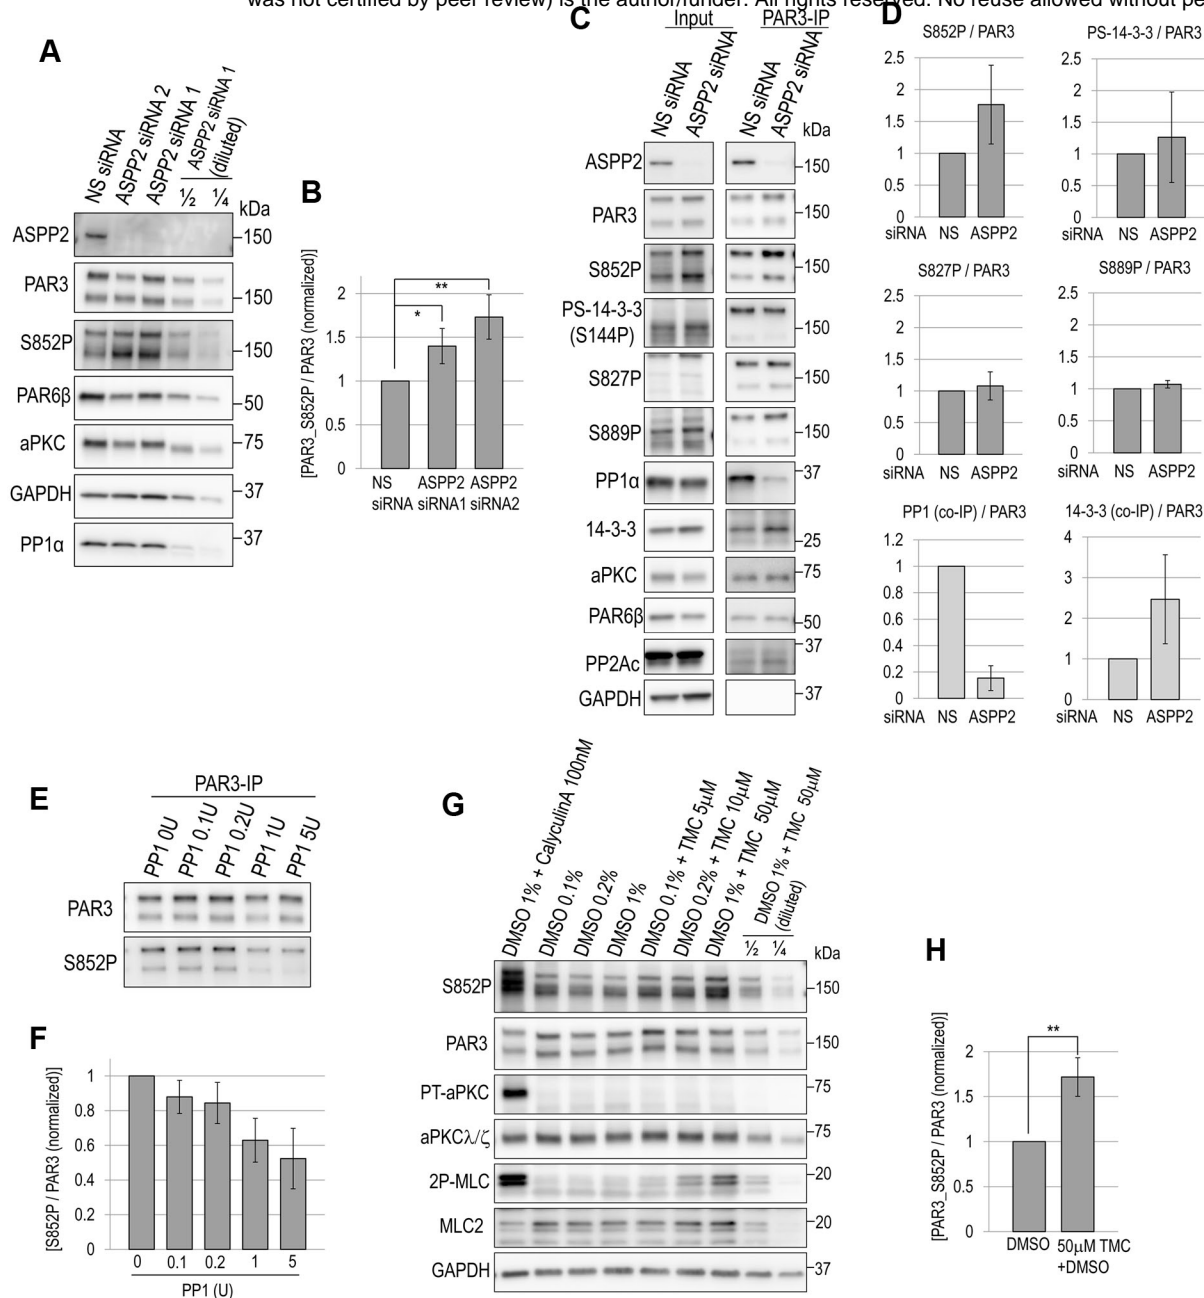

**Figure 3. Yamashita K et al.**



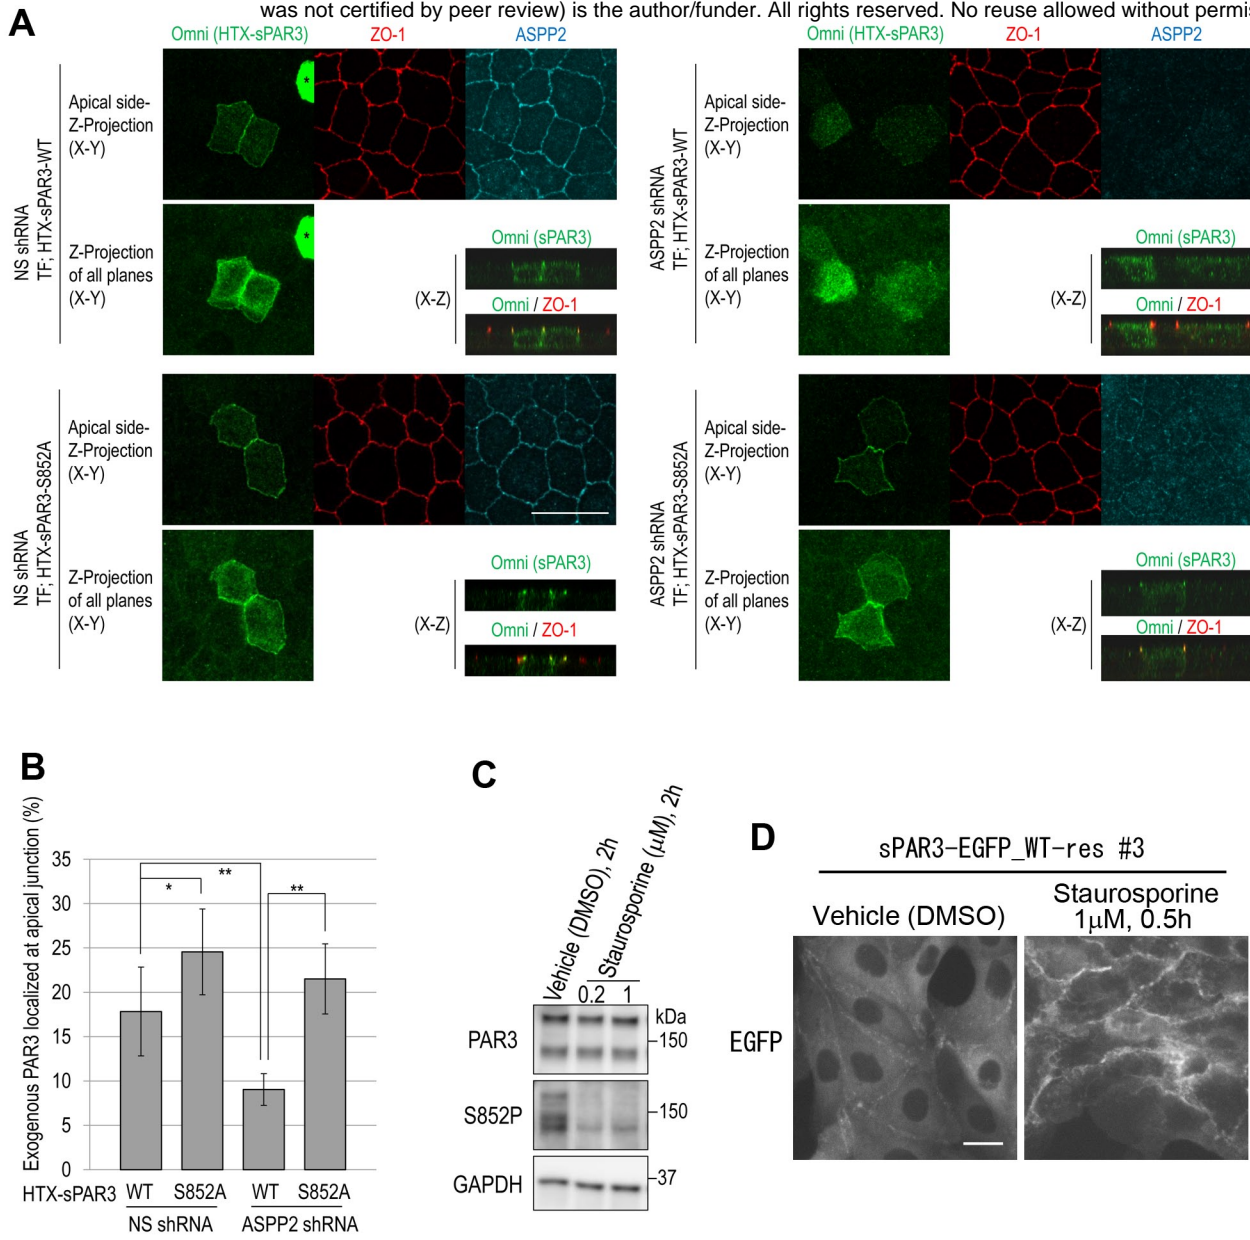

Figure 4. Yamashita K et al.

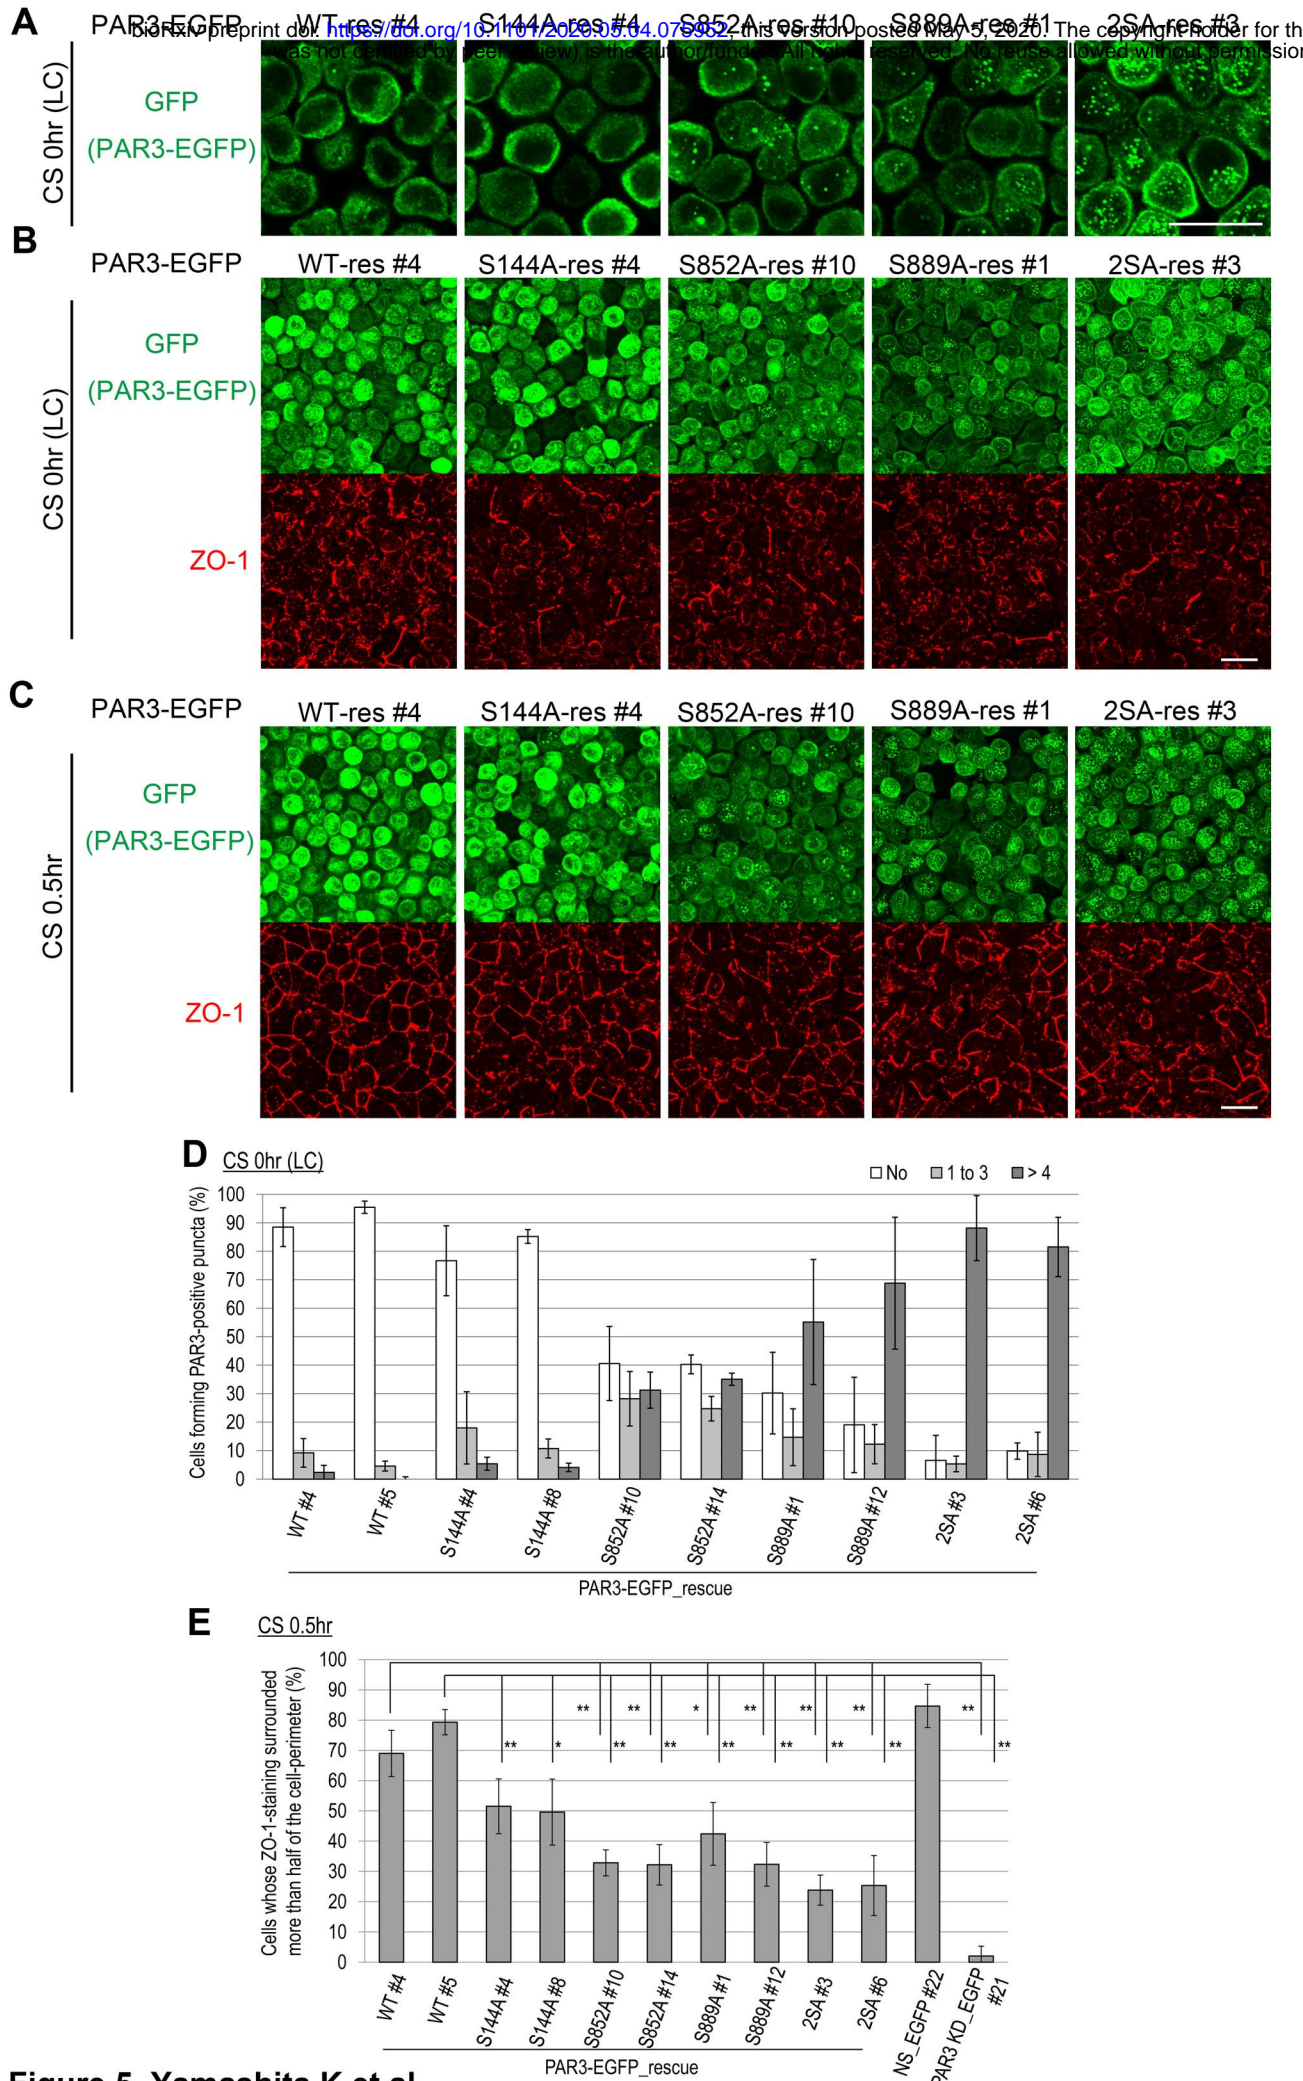

Figure 5. Yamashita K et al.



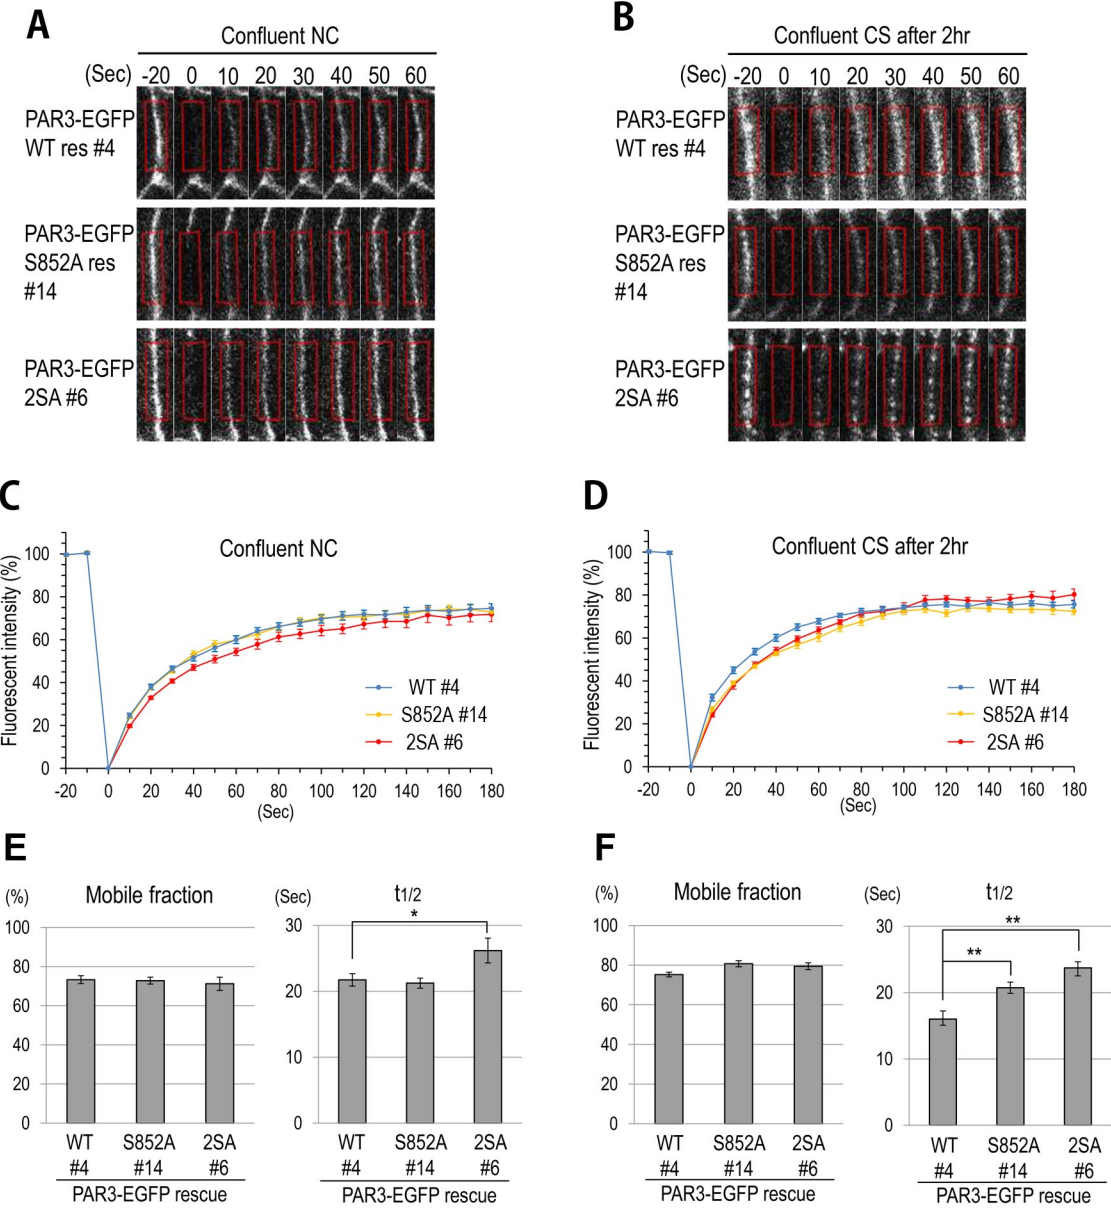

Figure 6. Yamashita K et al.

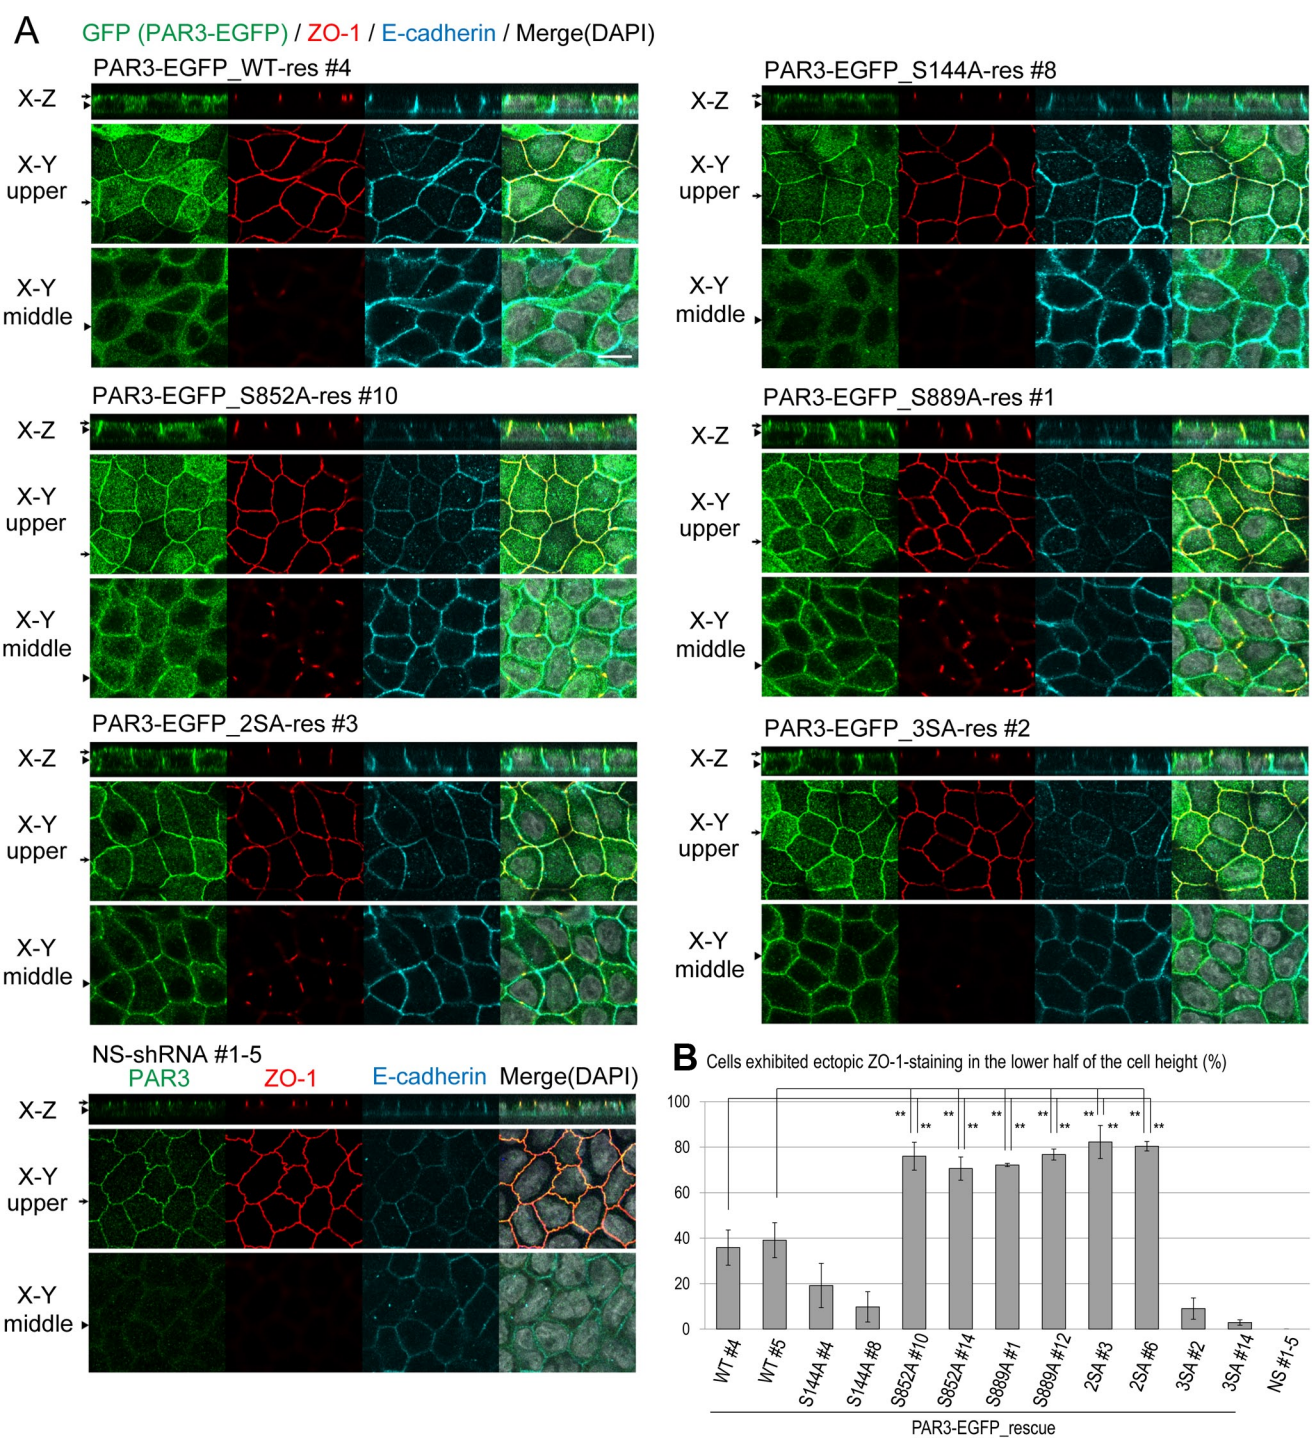

**Figure 7. Yamashita K et al.**

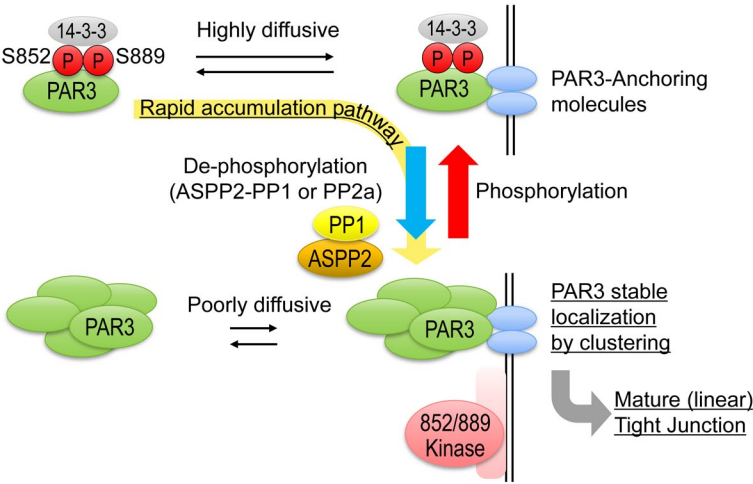

Figure.8 Yamashita K, et al.
